# Supplementary material
Source: Springer Nature journal article supplement (https://www.springermedizin.de/resource/supplementary/12885_2010_2820_MOESM4_ESM.pdf/9462016)

(A)

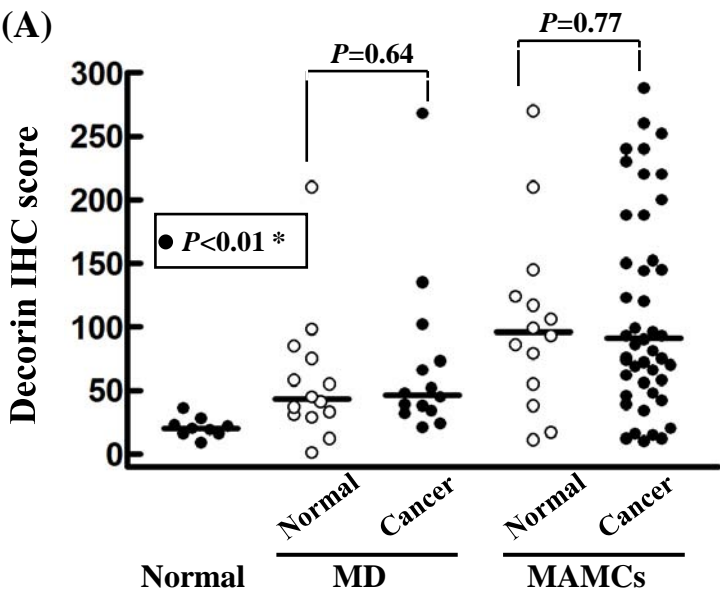

(B)

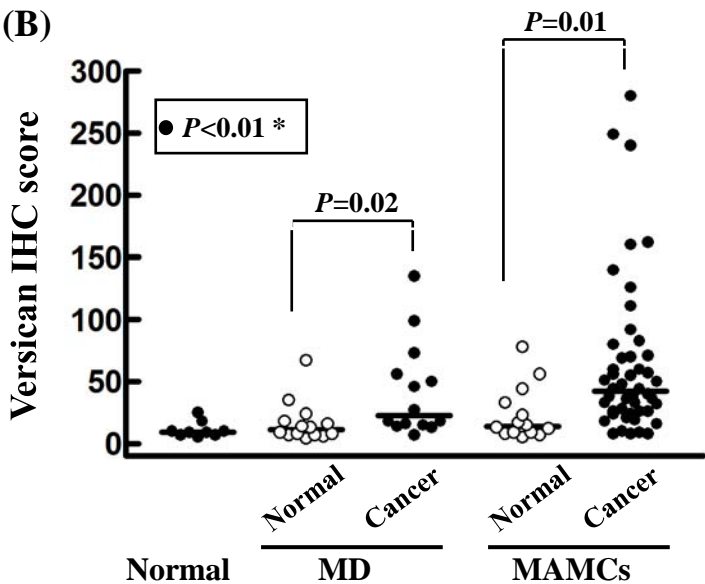

Supplement: MOESM4 [file 9462016]
